# Supplementary material for: The temperature-dependence of the structure-directing effect of 2-methylpiperazine in the synthesis of open-framework aluminophosphates
Source: Royal Society of Chemistry journal article supplement (doi:10.1039/c4ra05576d), 2014-01-01
Supplement: c4ra05576d1.pdf [file c4ra05576d1.pdf]

## **The temperature-dependence of the structure-directing effect of 2-methylpiperazine in the synthesis of open-framework aluminophosphates**

*Pai Huang<sup>a‡</sup>, Jun Xu<sup>b‡</sup>, Chao Wang<sup>b</sup>, Feng Deng<sup>b</sup>, Wenfu Yan<sup>a\*</sup>*

<sup>a</sup> State Key Laboratory of Inorganic Synthesis and Preparative Chemistry, College of Chemistry, Jilin University, 2699 Qianjin Street, Changchun 130012, PR China

<sup>b</sup> Wuhan Center for Magnetic Resonance, State Key Laboratory of Magnetic Resonance and Atomic and Molecular Physics, Wuhan Institute of Physics and Mathematics, The Chinese Academy of Sciences, Wuhan 430071, PR China

\*Corresponding authors: [yanw@jlu.edu.cn](mailto:yanw@jlu.edu.cn);

‡ These authors contributed equally to this work.

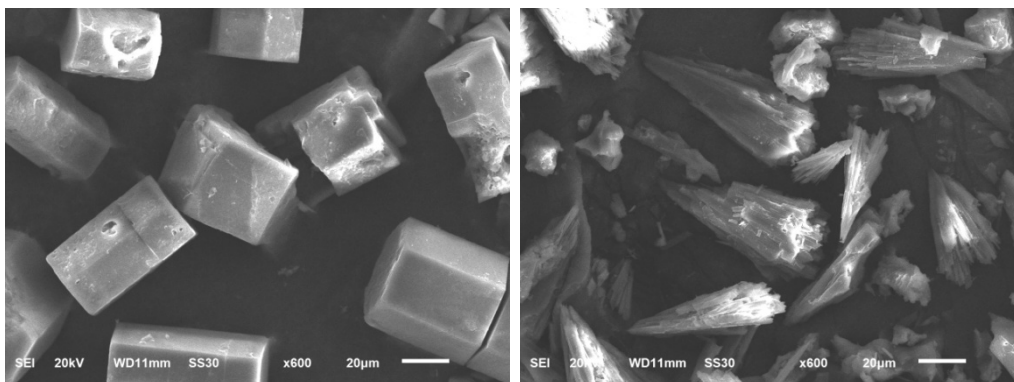

(a)

(b)

**Fig. S1.** The SEM images of the as-synthesized APMep150 (a) and APMep200 (b).

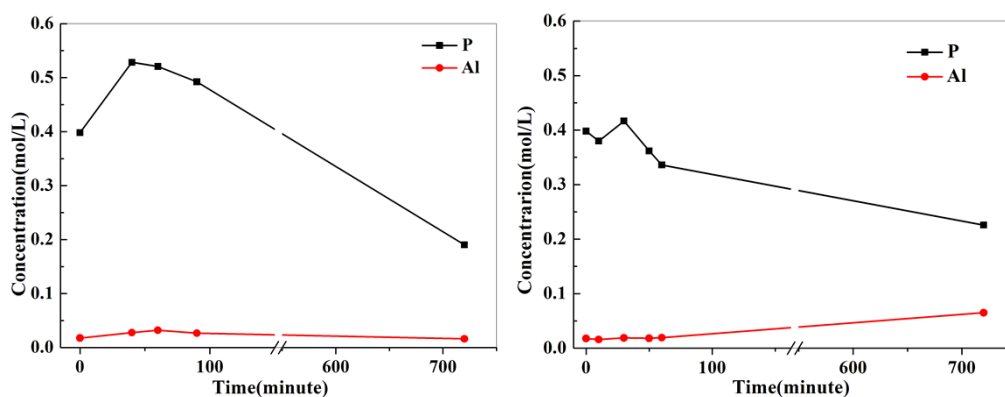

(a)

(b)

**Fig. S2.** The concentrations of the Al and P in the liquid phase of the samples that were isolated throughout the hydrothermal treatment period in the APMep150 (a) and APMep200 (b) crystallization.

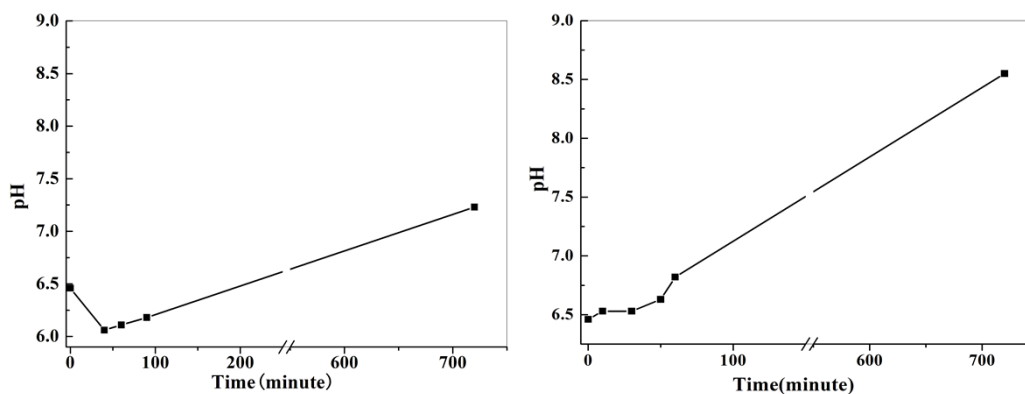

(a)

(b)

**Fig. S3.** The pH values of the liquid phase of the samples that were isolated throughout the hydrothermal treatment period in the APMep150 (a) and APMep200 (b) crystallization.

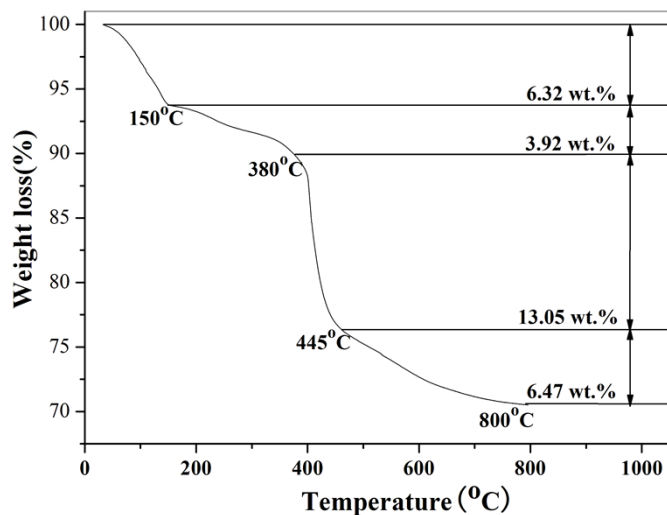

**Fig. S4** TG curve of APMcP150

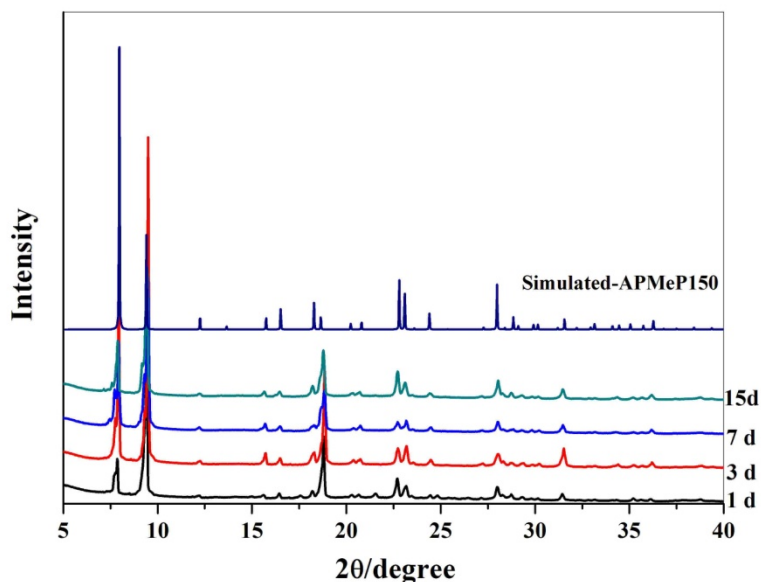

**Fig. S5** The simulated XRD patterns of APMcP150 and the experimental patterns of the as-synthesized samples at 150°C for 1, 3, 7, and 15 days.

**Table S1** The concentration of Al and P in the liquid phase of the samples isolated throughout the hydrothermal treatment period in the APMcP150 crystallization.

| Time(minute<br>) | 0      | 40     | 60     | 90     | 720    |
|------------------|--------|--------|--------|--------|--------|
| Al(mol/L)        | 0.0177 | 0.0277 | 0.0320 | 0.0266 | 0.0061 |
| P (mol/L)        | 0.3980 | 0.5283 | 0.5206 | 0.4922 | 0.1903 |

**Table S2** The pH values of the liquid phase of the samples isolated throughout the hydrothermal treatment period in the APMcP150 crystallization.

| Time(minute<br>) | 0 | 40 | 60 | 90 | 720 |
|------------------|---|----|----|----|-----|
|------------------|---|----|----|----|-----|

|    |      |      |      |      |      |
|----|------|------|------|------|------|
| pH | 6.46 | 6.06 | 6.11 | 6.18 | 7.23 |
|----|------|------|------|------|------|

**Table S3** The concentration of Al and P in the liquid phase of the samples isolated throughout the hydrothermal treatment period in the APMcP200 crystallization.

|               |        |        |        |        |        |        |
|---------------|--------|--------|--------|--------|--------|--------|
| Time(minute ) | 0      | 10     | 30     | 50     | 60     | 720    |
| Al(mol/L)     | 0.0177 | 0.0158 | 0.0187 | 0.0181 | 0.0191 | 0.0650 |
| P (mol/L)     | 0.3980 | 0.3800 | 0.4167 | 0.3619 | 0.3361 | 0.2258 |

**Table S4** The pH values of the liquid phase of the samples isolated throughout the hydrothermal treatment period in the APMcP200 crystallization.

|               |      |      |      |      |      |      |
|---------------|------|------|------|------|------|------|
| Time(minute ) | 0    | 10   | 30   | 50   | 60   | 720  |
| pH            | 6.46 | 6.53 | 6.53 | 6.63 | 6.82 | 8.55 |

**Table S5** The bond lengths of the C-C and C-N bonds in the unique MeP molecules in APMcP150 and APMcP200.

| Structure | Unique MeP | Bond length (Å) |       |       |       |       |       |                       |
|-----------|------------|-----------------|-------|-------|-------|-------|-------|-----------------------|
|           |            | N-C             | N-C   | N-C   | N-C   | C-C   | C-C   | C-C <sub>methyl</sub> |
| APMcP150  | 1          | 1.419           | 1.505 | 1.512 | 1.430 | 1.539 | 1.479 | 1.514                 |
| APMcP200  | 1          | 1.467           | 1.478 | 1.470 | 1.460 | 1.534 | 1.480 | 1.405                 |
|           | 2          | 1.505           | 1.488 | 1.502 | 1.452 | 1.521 | 1.486 | 1.576                 |
|           | 3          | 1.443           | 1.451 | 1.474 | 1.425 | 1.501 | 1.528 | 1.325                 |
|           | 4          | 1.491           | 1.439 | 1.456 | 1.494 | 1.532 | 1.541 | 1.448                 |
|           | 5          | 1.463           | 1.474 | 1.463 | 1.474 | 1.512 | 1.512 | 1.127×2               |
